# Supplementary material for: Molecular Docking Optimization in the Context of Multi-Drug Resistant and Sensitive EGFR Mutants
Source: PubMed Central journal article supplement (PMC6274512; doi:10.3390/molecules21111575), 2016-11-19
Supplement: molecules-21-01575-s001.pdf [file molecules-21-01575-s001.pdf]

# Supplementary Materials: Molecular Docking Optimization in the Context of Multi-Drug Resistant and Sensitive EGFR Mutants

María Jesús García-Godoy, Esteban López-Camacho, José García-Nieto, Antonio J. Nebro and José F. Aldana-Montes

**Table S1.** Median and Interquartile range of  $I_{HV}$  quality indicator for each algorithm (SMPSO, GDE3, MOEA/D and NSGAI) and instance. The best and second best median values are shown in dark gray and light gray backgrounds, respectively.

|               | SMPSO                                                                              | GDE3                                                                               | MOEA/D                                                                             | NSGA-II                                                                            |
|---------------|------------------------------------------------------------------------------------|------------------------------------------------------------------------------------|------------------------------------------------------------------------------------|------------------------------------------------------------------------------------|
| Wild type     |                                                                                    |                                                                                    |                                                                                    |                                                                                    |
| 3vjo          | <b><math>4.57 \times 10^{-1}</math></b> <sub><math>3.0 \times 10^{-2}</math></sub> | $4.16 \times 10^{-1}$ <sub><math>8.3 \times 10^{-2}</math></sub>                   | <b><math>5.12 \times 10^{-1}</math></b> <sub><math>9.3 \times 10^{-2}</math></sub> | $3.75 \times 10^{-1}$ <sub><math>1.1 \times 10^{-1}</math></sub>                   |
| 4i23          | $5.48 \times 10^{-1}$ <sub><math>8.0 \times 10^{-3}</math></sub>                   | <b><math>5.63 \times 10^{-1}</math></b> <sub><math>1.9 \times 10^{-3}</math></sub> | $5.67 \times 10^{-1}$ <sub><math>1.6 \times 10^{-3}</math></sub>                   | $5.39 \times 10^{-1}$ <sub><math>2.5 \times 10^{-2}</math></sub>                   |
| 4zau          | $5.95 \times 10^{-1}$ <sub><math>5.5 \times 10^{-3}</math></sub>                   | <b><math>6.70 \times 10^{-1}</math></b> <sub><math>4.3 \times 10^{-2}</math></sub> | $6.85 \times 10^{-1}$ <sub><math>7.4 \times 10^{-2}</math></sub>                   | $6.70 \times 10^{-1}$ <sub><math>5.9 \times 10^{-1}</math></sub>                   |
| G719S / L858R |                                                                                    |                                                                                    |                                                                                    |                                                                                    |
| 2j6m          | $8.60 \times 10^{-1}$ <sub><math>5.8 \times 10^{-3}</math></sub>                   | <b><math>8.84 \times 10^{-1}</math></b> <sub><math>4.4 \times 10^{-3}</math></sub> | $8.69 \times 10^{-1}$ <sub><math>6.6 \times 10^{-3}</math></sub>                   | <b><math>8.82 \times 10^{-1}</math></b> <sub><math>1.4 \times 10^{-2}</math></sub> |
| T790M / G719S |                                                                                    |                                                                                    |                                                                                    |                                                                                    |
| 3ug2          | $4.13 \times 10^{-1}$ <sub><math>2.1 \times 10^{-2}</math></sub>                   | <b><math>4.42 \times 10^{-1}</math></b> <sub><math>2.5 \times 10^{-2}</math></sub> | $4.57 \times 10^{-1}$ <sub><math>2.1 \times 10^{-2}</math></sub>                   | $4.36 \times 10^{-1}$ <sub><math>2.5 \times 10^{-2}</math></sub>                   |
| 3vjn          | $0.00 \times 10^{+0}$ <sub><math>0.0 \times 10^{+0}</math></sub>                   | $0.00 \times 10^{+0}$ <sub><math>0.0 \times 10^{+0}</math></sub>                   | <b><math>6.04 \times 10^{-1}</math></b> <sub><math>1.9 \times 10^{-1}</math></sub> | $0.00 \times 10^{+0}$ <sub><math>2.7 \times 10^{-1}</math></sub>                   |
| G719S         |                                                                                    |                                                                                    |                                                                                    |                                                                                    |
| 2itn          | $7.48 \times 10^{-1}$ <sub><math>2.0 \times 10^{-2}</math></sub>                   | <b><math>7.72 \times 10^{-1}</math></b> <sub><math>4.5 \times 10^{-2}</math></sub> | $7.75 \times 10^{-1}$ <sub><math>3.4 \times 10^{-2}</math></sub>                   | $7.25 \times 10^{-1}$ <sub><math>1.1 \times 10^{-1}</math></sub>                   |
| 2ito          | $4.35 \times 10^{-1}$ <sub><math>2.0 \times 10^{-2}</math></sub>                   | <b><math>4.70 \times 10^{-1}</math></b> <sub><math>6.1 \times 10^{-2}</math></sub> | $5.04 \times 10^{-1}$ <sub><math>6.1 \times 10^{-2}</math></sub>                   | <b><math>5.11 \times 10^{-1}</math></b> <sub><math>6.2 \times 10^{-2}</math></sub> |
| 2itp          | $5.57 \times 10^{-1}$ <sub><math>1.2 \times 10^{-2}</math></sub>                   | <b><math>6.09 \times 10^{-1}</math></b> <sub><math>7.0 \times 10^{-3}</math></sub> | $6.05 \times 10^{-1}$ <sub><math>5.8 \times 10^{-2}</math></sub>                   | $5.34 \times 10^{-1}$ <sub><math>3.8 \times 10^{-1}</math></sub>                   |
| 2itq          | $6.05 \times 10^{-1}$ <sub><math>1.1 \times 10^{-2}</math></sub>                   | <b><math>6.45 \times 10^{-1}</math></b> <sub><math>3.1 \times 10^{-3}</math></sub> | $6.49 \times 10^{-1}$ <sub><math>7.0 \times 10^{-3}</math></sub>                   | $6.38 \times 10^{-1}$ <sub><math>9.8 \times 10^{-3}</math></sub>                   |
| L858R         |                                                                                    |                                                                                    |                                                                                    |                                                                                    |
| 2eb3          | $5.58 \times 10^{-1}$ <sub><math>1.1 \times 10^{-1}</math></sub>                   | <b><math>6.68 \times 10^{-1}</math></b> <sub><math>8.8 \times 10^{-2}</math></sub> | $6.88 \times 10^{-1}$ <sub><math>9.8 \times 10^{-2}</math></sub>                   | $6.40 \times 10^{-1}$ <sub><math>8.9 \times 10^{-2}</math></sub>                   |
| 2itu          | <b><math>5.75 \times 10^{-1}</math></b> <sub><math>2.3 \times 10^{-2}</math></sub> | $5.29 \times 10^{-1}$ <sub><math>1.1 \times 10^{-3}</math></sub>                   | $6.05 \times 10^{-1}$ <sub><math>8.6 \times 10^{-3}</math></sub>                   | $5.33 \times 10^{-1}$ <sub><math>6.2 \times 10^{-2}</math></sub>                   |
| 2itz          | $4.11 \times 10^{-1}$ <sub><math>1.6 \times 10^{-2}</math></sub>                   | <b><math>5.40 \times 10^{-1}</math></b> <sub><math>3.3 \times 10^{-2}</math></sub> | $5.09 \times 10^{-1}$ <sub><math>5.9 \times 10^{-2}</math></sub>                   | $4.90 \times 10^{-1}$ <sub><math>8.1 \times 10^{-2}</math></sub>                   |
| T790M         |                                                                                    |                                                                                    |                                                                                    |                                                                                    |
| 2jiu          | $4.99 \times 10^{-1}$ <sub><math>3.3 \times 10^{-3}</math></sub>                   | <b><math>5.13 \times 10^{-1}</math></b> <sub><math>1.0 \times 10^{-2}</math></sub> | $5.25 \times 10^{-1}$ <sub><math>8.6 \times 10^{-3}</math></sub>                   | $5.12 \times 10^{-1}$ <sub><math>1.5 \times 10^{-2}</math></sub>                   |
| 5j9y          | $8.18 \times 10^{-1}$ <sub><math>1.4 \times 10^{-3}</math></sub>                   | <b><math>8.22 \times 10^{-1}</math></b> <sub><math>2.2 \times 10^{-4}</math></sub> | $8.78 \times 10^{-1}$ <sub><math>1.4 \times 10^{-2}</math></sub>                   | $8.22 \times 10^{-1}$ <sub><math>2.7 \times 10^{-1}</math></sub>                   |
| 5j9z          | $9.01 \times 10^{-1}$ <sub><math>8.6 \times 10^{-4}</math></sub>                   | <b><math>9.05 \times 10^{-1}</math></b> <sub><math>4.4 \times 10^{-5}</math></sub> | $9.23 \times 10^{-1}$ <sub><math>3.8 \times 10^{-3}</math></sub>                   | <b><math>9.05 \times 10^{-1}</math></b> <sub><math>1.6 \times 10^{-4}</math></sub> |
| T790M / L858R |                                                                                    |                                                                                    |                                                                                    |                                                                                    |
| 3w2s          | <b><math>5.65 \times 10^{-1}</math></b> <sub><math>2.4 \times 10^{-2}</math></sub> | $0.00 \times 10^{+0}$ <sub><math>0.0 \times 10^{+0}</math></sub>                   | $6.31 \times 10^{-1}$ <sub><math>2.3 \times 10^{-2}</math></sub>                   | $0.00 \times 10^{+0}$ <sub><math>0.0 \times 10^{+0}</math></sub>                   |
| 4rj4          | $4.70 \times 10^{-1}$ <sub><math>8.7 \times 10^{-2}</math></sub>                   | <b><math>6.89 \times 10^{-1}</math></b> <sub><math>3.3 \times 10^{-2}</math></sub> | $8.71 \times 10^{-1}$ <sub><math>6.7 \times 10^{-2}</math></sub>                   | $6.19 \times 10^{-1}$ <sub><math>4.3 \times 10^{-2}</math></sub>                   |
| 4rj5          | $2.07 \times 10^{-1}$ <sub><math>1.9 \times 10^{-2}</math></sub>                   | $2.11 \times 10^{-1}$ <sub><math>3.8 \times 10^{-3}</math></sub>                   | $2.16 \times 10^{-1}$ <sub><math>2.0 \times 10^{-2}</math></sub>                   | <b><math>2.20 \times 10^{-1}</math></b> <sub><math>4.1 \times 10^{-2}</math></sub> |
| 4rj6          | $2.48 \times 10^{-1}$ <sub><math>5.8 \times 10^{-2}</math></sub>                   | <b><math>4.90 \times 10^{-1}</math></b> <sub><math>1.0 \times 10^{-2}</math></sub> | $8.55 \times 10^{-1}$ <sub><math>5.9 \times 10^{-2}</math></sub>                   | $4.60 \times 10^{-1}$ <sub><math>4.8 \times 10^{-2}</math></sub>                   |
| 4rj7          | $6.64 \times 10^{-1}$ <sub><math>7.6 \times 10^{-3}</math></sub>                   | <b><math>7.08 \times 10^{-1}</math></b> <sub><math>2.6 \times 10^{-3}</math></sub> | $7.13 \times 10^{-1}$ <sub><math>2.0 \times 10^{-2}</math></sub>                   | $5.40 \times 10^{-1}$ <sub><math>6.9 \times 10^{-1}</math></sub>                   |
| 4rj8          | $6.16 \times 10^{-1}$ <sub><math>1.1 \times 10^{-2}</math></sub>                   | <b><math>6.44 \times 10^{-1}</math></b> <sub><math>6.0 \times 10^{-3}</math></sub> | $6.47 \times 10^{-1}$ <sub><math>7.8 \times 10^{-3}</math></sub>                   | $6.11 \times 10^{-1}$ <sub><math>2.2 \times 10^{-2}</math></sub>                   |
| 5c8k          | $5.92 \times 10^{-1}$ <sub><math>1.0 \times 10^{-2}</math></sub>                   | <b><math>6.15 \times 10^{-1}</math></b> <sub><math>1.2 \times 10^{-3}</math></sub> | $6.20 \times 10^{-1}$ <sub><math>9.7 \times 10^{-3}</math></sub>                   | $5.34 \times 10^{-1}$ <sub><math>2.6 \times 10^{-2}</math></sub>                   |
| 5c8m          | $5.49 \times 10^{-1}$ <sub><math>5.5 \times 10^{-3}</math></sub>                   | <b><math>5.74 \times 10^{-1}</math></b> <sub><math>5.5 \times 10^{-3}</math></sub> | $5.77 \times 10^{-1}$ <sub><math>1.9 \times 10^{-3}</math></sub>                   | <b><math>5.68 \times 10^{-1}</math></b> <sub><math>2.0 \times 10^{-1}</math></sub> |
| 5cal          | $5.70 \times 10^{-1}$ <sub><math>2.0 \times 10^{-2}</math></sub>                   | <b><math>5.95 \times 10^{-1}</math></b> <sub><math>6.4 \times 10^{-3}</math></sub> | $6.34 \times 10^{-1}$ <sub><math>4.7 \times 10^{-2}</math></sub>                   | <b><math>5.96 \times 10^{-1}</math></b> <sub><math>6.5 \times 10^{-1}</math></sub> |
| 5can          | $5.52 \times 10^{-1}$ <sub><math>2.8 \times 10^{-2}</math></sub>                   | <b><math>5.58 \times 10^{-1}</math></b> <sub><math>4.7 \times 10^{-3}</math></sub> | $6.15 \times 10^{-1}$ <sub><math>5.5 \times 10^{-2}</math></sub>                   | $5.44 \times 10^{-1}$ <sub><math>1.4 \times 10^{-1}</math></sub>                   |
| 5cao          | <b><math>4.66 \times 10^{-1}</math></b> <sub><math>1.3 \times 10^{-2}</math></sub> | $0.00 \times 10^{+0}$ <sub><math>2.7 \times 10^{-1}</math></sub>                   | $5.48 \times 10^{-1}$ <sub><math>5.4 \times 10^{-2}</math></sub>                   | $2.37 \times 10^{-1}$ <sub><math>4.6 \times 10^{-1}</math></sub>                   |
| 5cap          | $4.37 \times 10^{-1}$ <sub><math>8.1 \times 10^{-2}</math></sub>                   | <b><math>5.61 \times 10^{-1}</math></b> <sub><math>2.1 \times 10^{-1}</math></sub> | $5.66 \times 10^{-1}$ <sub><math>3.8 \times 10^{-2}</math></sub>                   | $3.81 \times 10^{-1}$ <sub><math>2.0 \times 10^{-1}</math></sub>                   |
| 5caq          | $6.53 \times 10^{-1}$ <sub><math>6.2 \times 10^{-3}</math></sub>                   | <b><math>6.75 \times 10^{-1}</math></b> <sub><math>6.6 \times 10^{-3}</math></sub> | $6.80 \times 10^{-1}$ <sub><math>1.1 \times 10^{-2}</math></sub>                   | $5.96 \times 10^{-1}$ <sub><math>6.7 \times 10^{-2}</math></sub>                   |
| 5cas          | $6.07 \times 10^{-1}$ <sub><math>1.3 \times 10^{-2}</math></sub>                   | <b><math>6.31 \times 10^{-1}</math></b> <sub><math>3.7 \times 10^{-3}</math></sub> | $6.26 \times 10^{-1}$ <sub><math>9.4 \times 10^{-3}</math></sub>                   | $5.89 \times 10^{-1}$ <sub><math>3.0 \times 10^{-2}</math></sub>                   |
| 5cau          | $5.96 \times 10^{-1}$ <sub><math>2.3 \times 10^{-2}</math></sub>                   | <b><math>6.20 \times 10^{-1}</math></b> <sub><math>2.2 \times 10^{-3}</math></sub> | $6.20 \times 10^{-1}$ <sub><math>1.2 \times 10^{-2}</math></sub>                   | $5.49 \times 10^{-1}$ <sub><math>7.8 \times 10^{-2}</math></sub>                   |
| 5em5          | <b><math>5.95 \times 10^{-1}</math></b> <sub><math>9.8 \times 10^{-2}</math></sub> | $5.75 \times 10^{-1}$ <sub><math>3.5 \times 10^{-1}</math></sub>                   | $6.13 \times 10^{-1}$ <sub><math>3.8 \times 10^{-1}</math></sub>                   | $4.82 \times 10^{-2}$ <sub><math>3.5 \times 10^{-1}</math></sub>                   |
| 5em7          | $7.37 \times 10^{-1}$ <sub><math>2.9 \times 10^{-2}</math></sub>                   | <b><math>8.23 \times 10^{-1}</math></b> <sub><math>8.1 \times 10^{-3}</math></sub> | $7.79 \times 10^{-1}$ <sub><math>4.9 \times 10^{-2}</math></sub>                   | $7.62 \times 10^{-1}$ <sub><math>5.7 \times 10^{-2}</math></sub>                   |
| 5em8          | $4.37 \times 10^{-1}$ <sub><math>6.5 \times 10^{-2}</math></sub>                   | $5.00 \times 10^{-1}$ <sub><math>9.0 \times 10^{-3}</math></sub>                   | $5.22 \times 10^{-1}$ <sub><math>1.5 \times 10^{-1}</math></sub>                   | $5.15 \times 10^{-1}$ <sub><math>9.9 \times 10^{-2}</math></sub>                   |
| 5hic          | $5.58 \times 10^{-1}$ <sub><math>1.9 \times 10^{-2}</math></sub>                   | $0.00 \times 10^{+0}$ <sub><math>6.1 \times 10^{-1}</math></sub>                   | $6.07 \times 10^{-1}$ <sub><math>4.3 \times 10^{-3}</math></sub>                   | $5.92 \times 10^{-1}$ <sub><math>6.0 \times 10^{-1}</math></sub>                   |
